# Supplementary material
Source: PubMed Central journal article supplement (PMC2671888)
Supplement: NIHMS101868-supplement-1_si_001.pdf [file NIHMS101868-supplement-1_si_001.pdf]

Supplementary Material

**Structure and mechanism of Cu- and Ni-substituted analogs of metallo- $\beta$ -  
lactamase L1**

Zhenxin Hu,<sup>‡</sup> Lauren J. Spadafora,<sup>‡</sup> Christine E. Hajdin<sup>‡</sup> Brian Bennett,<sup>||</sup> and Michael W.  
Crowder<sup>‡</sup>

<sup>‡</sup>Department of Chemistry and Biochemistry, 160 Hughes Hall, Miami University, Oxford, OH  
45056; <sup>||</sup>National Biomedical EPR Center, Department of Biophysics, Medical College of  
Wisconsin, 8701 Watertown Plank Road, Milwaukee, WI 53226-0509

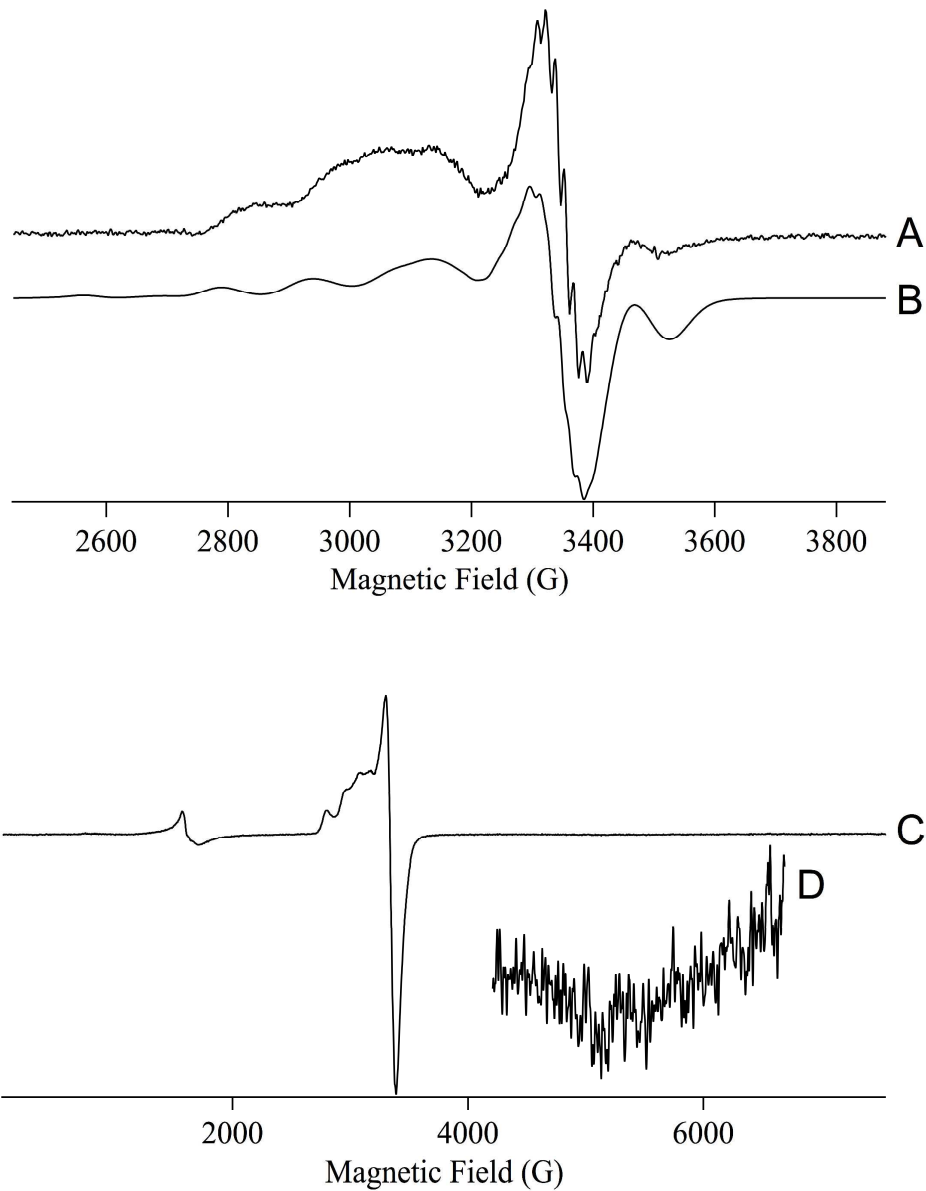

**Figure S1. EPR spectra of Cu-L1.** (A) difference spectrum generated by subtraction of the spectrum from Cu-L1 recorded at 0.1 mW, 10 K, from that recorded at 2 mW, 10 K. (B) Computer simulation assuming two Cu(II) ions with  $g_{\parallel} = 2.284$ ,  $A_{\parallel}(\text{Cu}) = 15.5 \times 10^{-3} \text{ cm}^{-1}$ ,  $g_{\perp} = 2.055$ ,  $A_{\perp}(\text{Cu}) = 1.10 \times 10^{-3} \text{ cm}^{-1}$ , and a Cu-Cu distance of 5 Å. The contribution of  $^{14}\text{N}$

superhyperfine was neglected in the simulation. (C) Experimental spectrum of Cu-L1 recorded at 2 mW, 10 K. (D) Expanded view of high-field region.
